# Supplementary material
Source: Research Square preprint supplement (doi:10.21203/rs.3.rs-9030463/v1)
Supplement: Supplementary file 1 [file 2f87dd223850eb2c08975548.xlsx]

## Sheet: Sheet1
No.	Sex	Age（y）	Allen type	Diagnosis	Duration of surgery（min）	Complication	follow-up（M）	VAS	MHQ(Average)	Hand function 5	Activities of daily living 17	work performance 5	pain 5	Aesthetic appearance 4	Patient satisfaction 6	VSS(Reconstructed site)	VSS(Donor site )	2-PD（mm）
1	F	45	III	Right index finger	480	scar	10	90	86	85	85	85	85	88	88	5	5	6
2	M	41	III	left thumb	595		8	95	85	80	81	85	85	88	92	3	4	8.1
3	M	26	III	left thumb	480		12	70	88	90	91	95	90	81	79	3	5	8.8
4	F	43	IV	Right index finger	640	Infection and non healing of bones	12	85	82	80	84	85	75	81	88	3	4	6.2
5	M	26	IV	left middle finger	580	bulky	6	88	88	85	93	90	95	81	83	2	3	9.9
6	M	34	II	Right index finger	420		10	75	90	95	90	90	95	88	83	3	3	8.8
7	M	32	II	left index finger	360		13	90	86	85	79	85	85	88	92	2	4	9.8
8	F	26	II	left thumb	280		12	79	92	95	94	95	95	88	83	4	6	8.2
9	F	26	III	left thumb	400	scar	14	88	87	90	88	85	90	88	83	5	5	9.1
10	M	44	III	left index finger	485		18	75	95	95	93	100	100	88	92	3	4	8.2
11	M	52	IV	Right thumb	590		14	95	88	85	89	80	85	94	92	3	4	9.1
12	M	40	II	left index finger	350		18	75	88	90	90	95	95	75	83	3	5	7.3
13	M	43	II	left thumb	405		14	90	90	90	90	85	90	94	92	3	4	7.2
14	M	47	III	left index finger	420	bulky	12	85	92	95	95	90	95	88	88	5	5	7.5
15	M	42	III	Right index finger	485		18	88	89	85	91	90	90	88	88	3	6	8.1
16	M	18	II	Right index finger	325		15	90	90	85	90	90	90	94	92	2	4	6.3
17	M	20	II	Left middle finger	300		21	78	88	90	91	90	95	75	88	3	5	7.3
18	M	25	III	left thumb	485		22	92	94	90	91	90	95	100	96	3	4	6.8
19	M	31	IV	Right index finger	540		20	80	90	85	88	85	90	100	92	3	4	6.6
20	M	56	III	left thumb	480	bulky	19	90	90	85	88	85	95	94	92	3	5	11
21	M	35	III	left index finger	455	scar	18	85	92	90	88	90	95	100	88	5	5	8.5
22	M	33	II	Right thumb	480		15	90	87	85	86	85	85	88	92	3	6	7.3
23	F	45	II	Right middle finger	420		12	85	86	85	89	85	90	81	88	3	7	8.9
24	M	18	III	Right index finger	490		6	80	88	85	91	90	90	88	83	3	4	7
25	F	31	II	left index finger	360		15	90	90	90	88	90	95	88	88	3	5	8
26	M	25	II	Right index finger	300		25	85	92	90	93	95	95	88	92	2	5	9
27	M	52	III	left index finger	600		9	88	84	85	84	85	85	83	81	3	5	8.5
28	M	26	IV	left middle finger	490		12	75	90	90	88	90	95	88	88	3	4	7.7
29	M	28	III	Right thumb	520	bulky	19	90	88	85	86	85	90	94	88	5	5	7.8
30	M	49	IV	left thumb	480		9	80	90	90	90	90	95	88	88	4	4	8.2
31	F	30	II	left index finger	425		12	90	83	85	84	85	80	81	83	3	5	6.9
32	M	39	III	Right thumb	560	scarring	17	60	78	75	76	80	80	75	83	5	4	7
33	M	44	III	left index finger	600		16	80	93	95	91	90	95	94	92	4	5	8
34	M	53	III	left thumb	475		22	85	85	85	82	85	90	81	88	4	4	9.5
35	M	21	III	Right index finger	535		25	85	90	90	88	90	95	88	88	4	3	9
